# Supplementary material
Source: PubMed Central journal article supplement (PMC4767624)
Supplement: NIHMS733236-supplement-Supplemental_Digital_Content_2.pdf [file NIHMS733236-supplement-Supplemental_Digital_Content_2.pdf]

## Supplemental Digital Appendix 2

### Logistic Regression Analyses: Characteristics of Academic Life Scientists Making, Receiving, or Refusing At Least One Request in the Previous Three Years for Additional Information, Data, or Materials, 2000 and 2013 National Surveys Combined

| Characteristic                                  | Model 1                                   |           |         | Model 2                                          |           |         | Model 3                                                   |           |         | Model 4                                            |           |         |
|-------------------------------------------------|-------------------------------------------|-----------|---------|--------------------------------------------------|-----------|---------|-----------------------------------------------------------|-----------|---------|----------------------------------------------------|-----------|---------|
|                                                 | Individuals who made at least one request |           |         | Individuals who were denied at least one request |           |         | Individuals who received from others at least one request |           |         | Individuals who denied others at least one request |           |         |
|                                                 | n = 2,578                                 |           |         | n = 1,826                                        |           |         | n = 2,643                                                 |           |         | n = 2,028                                          |           |         |
|                                                 | Odds ratio                                | 95% CI    | P value | Odds ratio                                       | 95% CI    | P value | Odds ratio                                                | 95% CI    | P value | Odds Ratio                                         | 95% CI    | P value |
| Gender = Male (vs. Female)                      | 0.98                                      | 0.75-1.29 | .89     | 0.83                                             | 0.63-1.09 | .19     | 0.84                                                      | 0.62-1.14 | .27     | 1.24                                               | 0.79-1.95 | .36     |
| Degree from U.S. institution (vs. not)          | 0.95                                      | 0.66-1.36 | .77     | 0.73                                             | 0.52-1.03 | .07     | 1.02                                                      | 0.70-1.48 | .93     | 0.69                                               | 0.43-1.11 | .12     |
| Publications = Low (0-5 pubs in last 3 years)   | (ref)                                     |           |         | (ref)                                            |           |         | (ref)                                                     |           |         | (ref)                                              |           |         |
| = Medium (6-15 pubs)                            | 1.81                                      | 1.35-2.42 | .00     | 1.05                                             | 0.77-1.42 | .77     | 2.34                                                      | 1.71-3.22 | .00     | 0.93                                               | 0.56-1.52 | .76     |
| = High (>16 pubs)                               | 1.74                                      | 1.28-2.36 | .00     | 1.26                                             | 0.92-1.74 | .15     | 3.18                                                      | 2.24-4.51 | .00     | 1.27                                               | 0.78-2.08 | .33     |
| Received grant income from industry (vs. no)    | 2.34                                      | 1.82-3.01 | .00     | 1.21                                             | 0.92-1.58 | .17     | 1.94                                                      | 1.47-2.56 | .00     | 1.38                                               | 0.90-2.12 | .14     |
| Engaged in commercial activities (vs. no)       | 1.26                                      | 0.94-1.68 | .12     | 1.40                                             | 1.07-1.84 | .01     | 1.21                                                      | 0.87-1.69 | .26     | 1.56                                               | 1.07-2.28 | .02     |
| Participate in human subjects research (vs. no) | 0.46                                      | 0.36-0.59 | .00     | 0.87                                             | 0.66-1.14 | .31     | 0.50                                                      | 0.38-0.66 | .00     | 1.20                                               | 0.82-1.75 | .35     |
| Self-identify as a geneticist (vs. no)          | 3.42                                      | 2.68-4.36 | .00     | 1.14                                             | 0.87-1.49 | .36     | 4.61                                                      | 3.46-6.14 | .00     | 1.21                                               | 0.82-1.79 | .33     |
| Survey in Wave 2= 2013 (vs. Wave 1 = 2000)      | 1.08                                      | 0.84-1.38 | .55     | 0.53                                             | 0.41-0.68 | .00     | 1.02                                                      | 0.77-1.36 | .89     | 0.85                                               | 0.56-1.29 | .45     |
| Number of requests made or received             |                                           |           |         | 1.03                                             | 1.01-1.05 | .00     |                                                           |           |         | 1.00                                               | 1.00-1.01 | .01     |
